# Supplementary material
Source: PubMed Central journal article supplement (PMC6419274)
Supplement: CJN.10420818SupplementaryData.pdf [file CJN.10420818SupplementaryData.pdf]

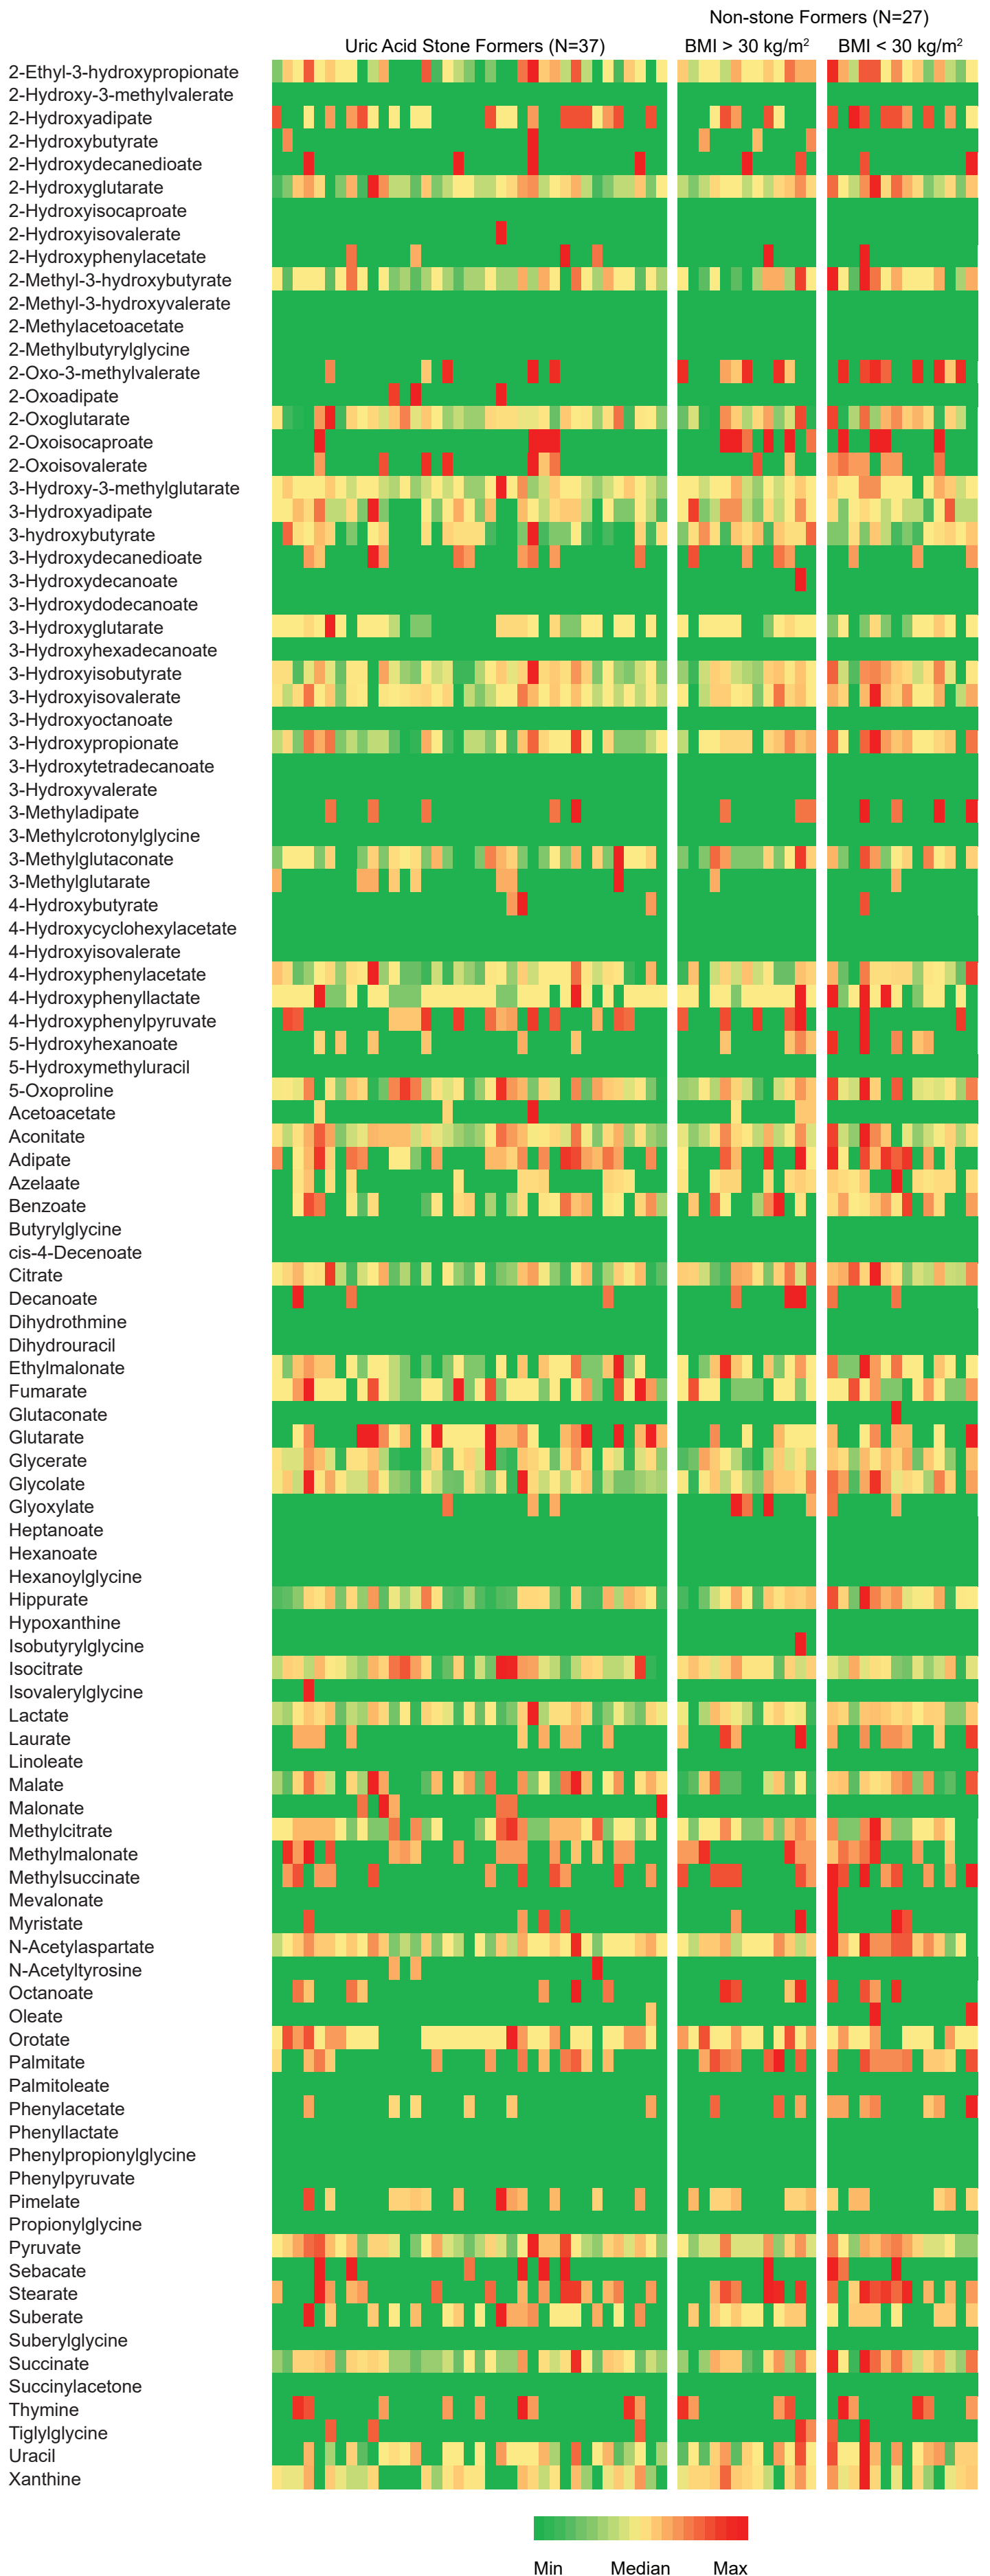

Supplemental Figure 1. There are no differences between non-stone formers and stone formers in the relative amounts of organic acids when reported as mmol/mol creatinine.
